# Supplementary figures and images for: Integration of genomics and histology revises diagnosis and enables effective therapy of refractory cancer of unknown primary with PDL1 amplification
Source: PubMed Central journal article supplement — Cold Spring Harb Mol Case Stud. 2016 Nov;2(6):a001180. doi: 10.1101/mcs.a001180 (PMC5111004; doi:10.1101/mcs.a001180), 2016-11

# Supplemental Figure S1

**A**

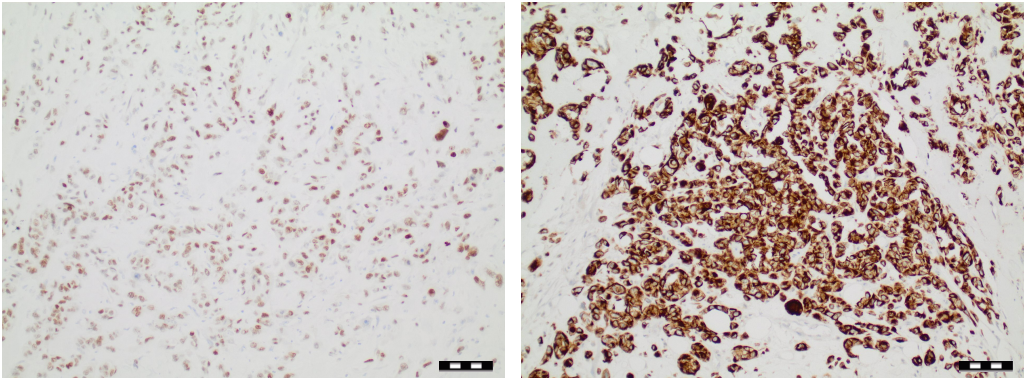

**B**

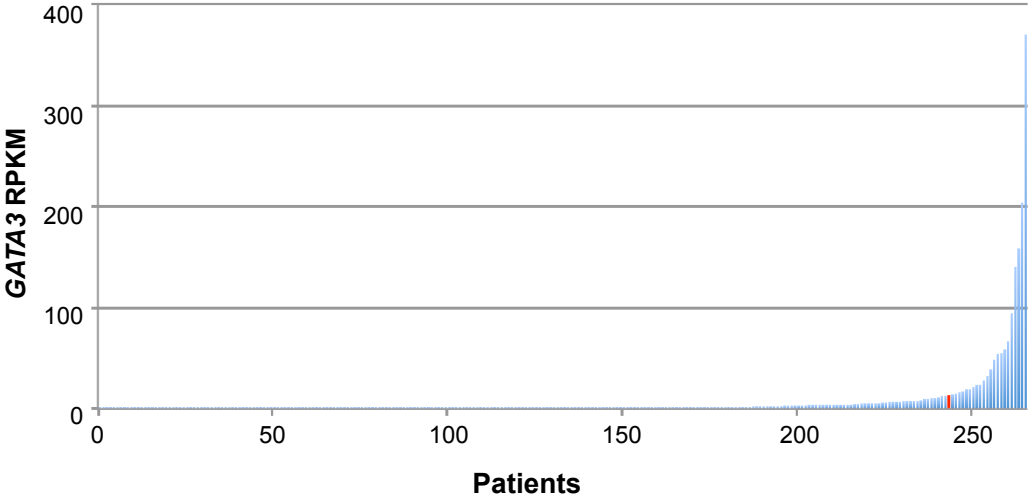

Supplement: supp_mcs.a001180_SuppFigS1.pdf [file supp_mcs.a001180_SuppFigS1.pdf]
